# Supplementary material for: Zr-based metal organic framework nanoparticles coated with a molecularly imprinted polymer for trace diazinon surface enhanced Raman scattering analysis
Source: Royal Society of Chemistry journal article supplement (doi:10.1039/d2nj01874h), 2022-01-01
Supplement: d2nj01874h1.pdf [file d2nj01874h1.pdf]

## Electronic Supplementary Information

Zr-based metal organic framework nanoparticles coated with  
a molecularly imprinted polymer for trace diazinon surface  
enhanced Raman scattering analysis

Tiantian Wan<sup>a,b</sup>, Luna Zhu<sup>b</sup>, Zulei Zhang<sup>b\*</sup>, Hailong Wang<sup>b</sup>, Yiwen Yang<sup>b</sup>, Hongyin  
Ye<sup>b</sup>, Hongmei Wang<sup>b</sup>, Lei Li<sup>b\*</sup> and Jinchun Li<sup>a\*</sup>

*<sup>a</sup>School of Petrochemical Engineering, Changzhou University, Changzhou 213016,  
China*

*<sup>b</sup>College of Biology and Chemical Engineering, Jiaxing University, Jiaxing 314001,  
China*

**\*Corresponding author:** Dr. Zulei Zhang, Professor Lei Li and Jinchun Li

**Email:** jerry3641172@126.com, lei.li@mail.zjxu.edu.cn, lijinchun88@163.com

**Fax:** +86-573-83646203; **Tel:** +86-573-83646203

## 1. Equations

The pseudo-first-order equation is generally expressed as:

$$\ln(Q_e - Q_t) = \ln Q_e - k_1 t \quad (1)$$

The pseudo-second-order equation is generally expressed as:

$$\frac{t}{Q_t} = \frac{1}{k_2 Q_e^2} + \frac{t}{Q_e} \quad (2)$$

where  $t$  (min) is adsorption time;  $Q_t$  (mg/g) and  $Q_e$  (mg/g) are the amounts of the adsorbed diazinon at time  $t$  (min) and at equilibrium, respectively;  $k_1$  is the rate constant of the pseudo-first-order adsorption model,  $k_2$  (g/(mg min)) represents the pseudo-second-order adsorption rate constant.

The Langmuir equation is as follows:

$$\frac{C_e}{Q_e} = \frac{1}{(Q_m K_L)} + \frac{C_e}{Q_m} \quad (3)$$

where  $K_L$  (L/mg) is the Langmuir constant, and  $Q_m$  (mg/g) is the maximum adsorption capacity for monolayer formation on the sorbents,  $C_e$  (mmol/L) is the free analytical concentration at equilibrium.

The linear mathematical expression of the Freundlich model is presented as:

$$\log q_e = \log k_F + (n) \log C_e \quad (4)$$

$k_F$  (g<sup>1-n</sup> L<sup>n</sup>/g) is Freundlich constant related to the adsorption capacity of the adsorbent, and  $n$  signifies adsorption intensity.

## 2. Supporting data

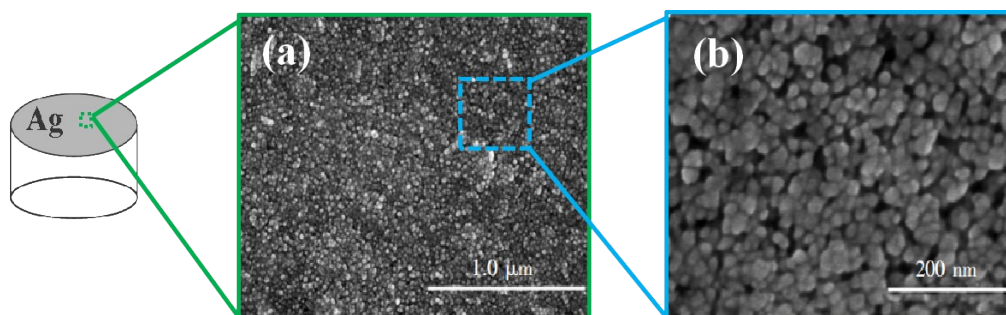

Fig. S1 SEM images of silver plated substrate at different magnifications

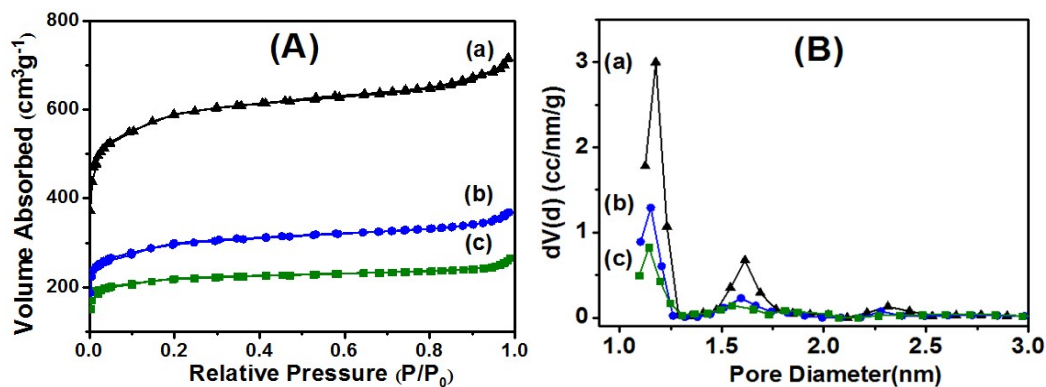

**Fig.S2** (A) N<sub>2</sub> adsorption-desorption isotherm of (a) UiO-67, (b) MOFs-MIPs, (c) MOFs-NIPs and (B) pore size distribution of (a) UiO-67, (b) MOFs-MIPs, (c) MOFs-NIPs.

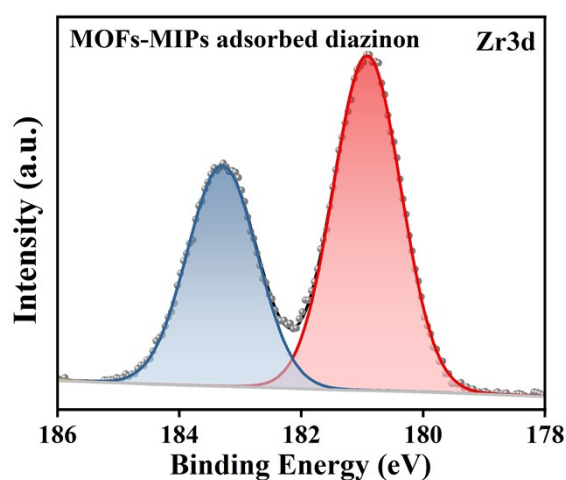

**Fig.S3** Zr3d high-resolution scans XPS spectrum of MOFs-MIPs after adsorption diazinon

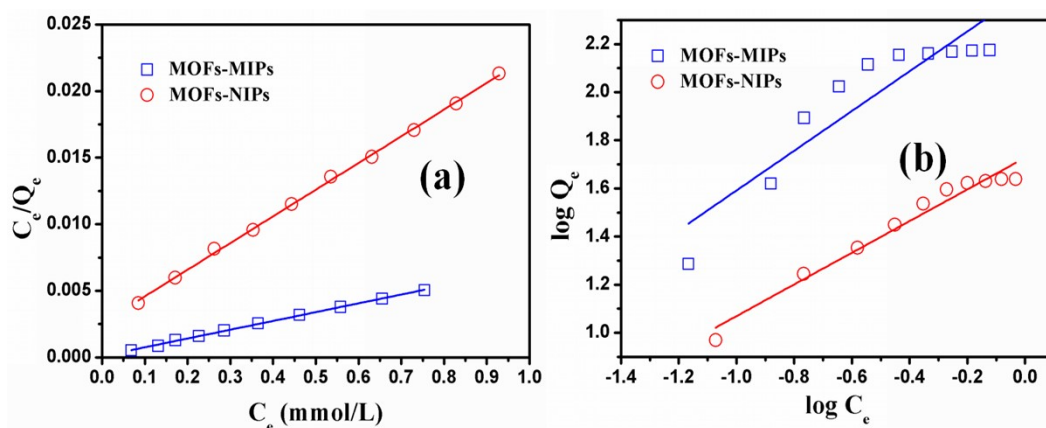

**Fig.S4** (a) Langmuir model and (b) Freundlich model of diazinon adsorption by MOFs-MIPs and MOFs-NIPs.
